# Supplementary material for: Oxygen-dependent generation of a graded polydopamine coating on nanofibrous materials for controlling stem cell functions
Source: Royal Society of Chemistry journal article supplement (doi:10.1039/c7tb00995j), 2017-01-01
Supplement: c7tb00995j1.pdf [file c7tb00995j1.pdf]

## Oxygen-dependent generation of a graded polydopamine coating on nanofibrous materials for controlling stem cell functions

Sajeesh Kumar Madhurakkat Perikamana<sup>a,b</sup>, Jin Kyu Lee<sup>a, b</sup>, Young Min Shin<sup>c</sup>, Taufiq Ahmad<sup>a,b</sup>, Se-jeong Kim<sup>a, b</sup>, Kyung Min Park<sup>d</sup>, and Heungsoo Shin<sup>a, b, \*</sup>

a)

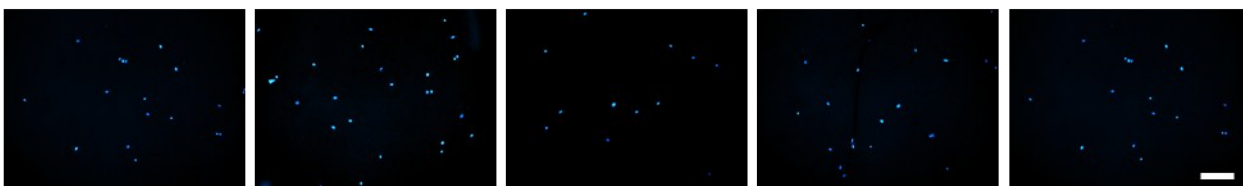

b)

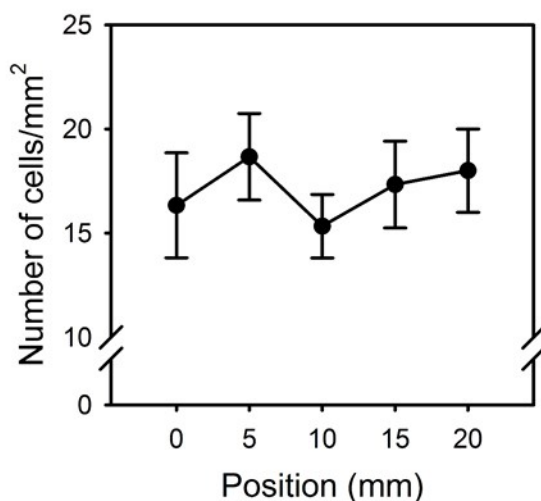

c)

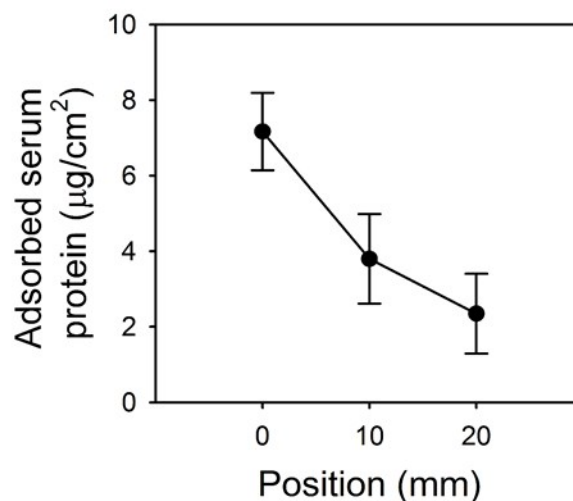

Figure S1. a) DAPI stained hMSCs on PD gradient nanofiber after 24 hr culture under serum free media (scale bar 100  $\mu\text{m}$ ). b) Number of hMSCs on different positions of PD gradient nanofiber. c) Quantified amount of adsorbed serum proteins from three representative positions of gradient nanofiber. Overall, the gradient of PD on the nanofiber surface appeared to allow gradual adsorption of serum protein along the PD gradient, which regulated stem cell adhesion. The study of cell adhesion without serum protein also supported these results.
